# Supplementary material for: General trends in the calnexin-dependent expression and pharmacological rescue of clinical CFTR variants
Source: eLife. 2025 Dec 11;14:RP107180. doi: 10.7554/eLife.107180 (PMC12698086; doi:10.7554/eLife.107180)
Supplement: Supplementary file 2. [file elife-107180-supp2.xlsx]

## Sheet: Sheet4
Variant	Amino Acid Substituion	CFTR sub-domain	Parental Surface Immuno-staining Intensity (Apo)	Parental Surface Immuno-staining Intensity (VX-661)	Parental Surface Immuno-staining Intensity (VX-445)	Parental Surface Immuno-staining Intensity (VX-445 + VX-661)	CANX KO Surface Immuno-staining Intensity (Apo)	CANX KO Surface Immuno-staining Intensity (VX-661)	CANX KO Surface Immuno-staining Intensity (VX-445)	CANX KO Surface Immuno-staining Intensity (VX-445 + VX-661)
R3W	7A>T	Lasso	913 ± 51	2602 ± 179	2934 ± 24	5281 ± 254	247 ± 9	980 ± 25	949 ± 119	2336 ± 48
P5L	14C>T	Lasso	260 ± 37	921 ± 235	2438 ± 152	4780 ± 95	78 ± 15	219 ± 19	774 ± 123	2015 ± 95
S13F	38C>T	Lasso	202 ± 43	498 ± 103	616 ± 51	2179 ± 291	72 ± 17	126 ± 13	169 ± 18	722 ± 73
L15P	44T>C	Lasso	212 ± 49	566 ± 126	535 ± 12	1845 ± 336	72 ± 19	126 ± 9	134 ± 11	538 ± 54
G27R	79G>A	Lasso	205 ± 43	518 ± 112	644 ± 52	2107 ± 395	70 ± 18	114 ± 21	154 ± 18	663 ± 24
R31C	91C>T	Lasso	532 ± 35	1853 ± 338	2224 ± 259	4364 ± 369	155 ± 6	680 ± 43	737 ± 66	1934 ± 50
R31L	92G>T	Lasso	352 ± 18	1219 ± 289	2343 ± 279	4274 ± 352	108 ± 11	378 ± 26	731 ± 86	1784 ± 11
A46D	137C>A	Lasso	218 ± 44	564 ± 128	1461 ± 213	3573 ± 348	70 ± 15	133 ± 11	455 ± 50	1474 ± 73
E56K	166G>A	Lasso	208 ± 48	825 ± 188	446 ± 42	1723 ± 325	72 ± 16	249 ± 16	115 ± 17	557 ± 23
W57G	169T>G	Lasso	200 ± 48	450 ± 85	392 ± 39	637 ± 109	67 ± 17	103 ± 15	102 ± 22	180 ± 40
E60K	178G>A	Lasso	198 ± 45	513 ± 117	388 ± 37	903 ± 161	66 ± 14	130 ± 18	100 ± 20	263 ± 16
P67L	200C>T	Lasso	212 ± 50	786 ± 146	447 ± 48	1782 ± 293	70 ± 15	225 ± 19	110 ± 16	557 ± 57
R74W	220C>T	Lasso	518 ± 20	1703 ± 233	1562 ± 220	3568 ± 322	129 ± 5	556 ± 49	443 ± 13	1274 ± 36
R74Q	221G>A	Lasso	784 ± 73	2975 ± 174	2175 ± 172	5170 ± 152	211 ± 8	1142 ± 35	722 ± 65	2387 ± 40
R75Q	224G>A	Lasso	759 ± 89	2886 ± 76	1938 ± 232	5045 ± 53	212 ± 6	1137 ± 9	662 ± 81	2330 ± 105
G85E	254G>A	TMD1	200 ± 43	454 ± 103	384 ± 42	676 ± 97	67 ± 15	109 ± 16	102 ± 17	184 ± 25
G91R	271G>A	TMD1	195 ± 47	528 ± 131	409 ± 38	1639 ± 312	67 ± 17	121 ± 13	105 ± 16	456 ± 35
E92K	274G>A	TMD1	204 ± 57	488 ± 89	405 ± 49	720 ± 93	70 ± 14	112 ± 15	105 ± 15	190 ± 27
Q98R	293A>G	TMD1	210 ± 47	951 ± 173	490 ± 21	2170 ± 408	69 ± 15	296 ± 23	124 ± 13	708 ± 94
P99L	296C>T	TMD1	428 ± 20	906 ± 212	1415 ± 211	1921 ± 357	118 ± 10	226 ± 8	355 ± 40	562 ± 30
L102R	305T>G	TMD1	199 ± 42	441 ± 96	381 ± 43	697 ± 161	64 ± 15	96 ± 15	90 ± 14	159 ± 28
Y109N	325T>A	TMD1	743 ± 93	2484 ± 77	1939 ± 188	4444 ± 160	211 ± 2	939 ± 13	641 ± 91	1941 ± 15
D110Y	328G>T	TMD1	495 ± 20	2140 ± 204	1594 ± 190	4397 ± 231	134 ± 5	721 ± 25	464 ± 44	1715 ± 55
D110H	328G>C	TMD1	1065 ± 79	3097 ± 102	2606 ± 163	5337 ± 143	274 ± 12	1111 ± 36	845 ± 75	2285 ± 59
D110E	330C>A	TMD1	1337 ± 46	3511 ± 195	3237 ± 85	5912 ± 341	393 ± 32	1452 ± 10	1197 ± 146	3071 ± 34
E116K	346G>A	TMD1	982 ± 92	2990 ± 37	2343 ± 223	4936 ± 68	284 ± 18	1195 ± 49	877 ± 116	2491 ± 79
R117C	349C>T	TMD1	833 ± 50	2405 ± 122	2310 ± 148	4593 ± 102	220 ± 2	841 ± 23	731 ± 90	1887 ± 45
R117G	349C>G	TMD1	950 ± 65	1548 ± 1341	2381 ± 137	4208 ± 222	257 ± 8	888 ± 71	772 ± 75	1792 ± 56
R117H	350G>A	TMD1	1060 ± 65	2853 ± 51	2668 ± 56	4953 ± 141	272 ± 10	959 ± 21	839 ± 67	2010 ± 46
R117P	350G>C	TMD1	979 ± 109	2679 ± 132	2656 ± 93	4776 ± 74	299 ± 25	1023 ± 21	952 ± 118	2280 ± 51
R117L	350G>T	TMD1	762 ± 45	2191 ± 188	2080 ± 210	4156 ± 144	192 ± 1	701 ± 25	609 ± 57	1557 ± 63
A120T	358G>A	TMD1	1302 ± 43	3206 ± 142	3217 ± 57	5466 ± 178	346 ± 15	1212 ± 46	1046 ± 108	2453 ± 74
G126D	377G>A	TMD1	350 ± 26	1472 ± 330	1303 ± 157	3413 ± 340	99 ± 11	444 ± 33	374 ± 47	1313 ± 42
I148T	443T>C	TMD1	1049 ± 49	3134 ± 194	2588 ± 30	5261 ± 210	289 ± 20	1165 ± 29	874 ± 109	2401 ± 36
Y161D	481T>G	TMD1	199 ± 51	474 ± 108	427 ± 50	1665 ± 232	69 ± 16	120 ± 9	110 ± 18	535 ± 34
Y161C	482A>C	TMD1	206 ± 43	582 ± 121	749 ± 35	3240 ± 362	72 ± 17	142 ± 10	204 ± 23	1152 ± 78
L165S	494T>C	TMD1	199 ± 58	495 ± 104	806 ± 17	2573 ± 266	73 ± 15	126 ± 19	224 ± 34	955 ± 120
R170H	509G>A	TMD1	1216 ± 33	3030 ± 104	2953 ± 56	5204 ± 129	313 ± 12	1096 ± 10	952 ± 107	2198 ± 21
L172I	514C>A	TMD1	1116 ± 50	2953 ± 114	3109 ± 130	5344 ± 384	337 ± 9	1219 ± 79	1155 ± 138	2651 ± 129
G178R	532G>A	TMD1	1009 ± 92	2784 ± 73	2655 ± 101	4991 ± 172	267 ± 13	1025 ± 26	875 ± 85	2224 ± 21
G178E	533G>A	TMD1	1369 ± 32	3348 ± 165	3392 ± 128	5817 ± 362	391 ± 20	1369 ± 23	1277 ± 167	2892 ± 95
F191V	571T>G	TMD1	233 ± 42	787 ± 168	1526 ± 206	3575 ± 369	77 ± 16	220 ± 9	466 ± 65	1397 ± 73
D192G	575A>G	TMD1	251 ± 39	753 ± 194	1774 ± 241	3356 ± 364	78 ± 15	172 ± 12	506 ± 53	1160 ± 51
E193K	577G>A	TMD1	838 ± 57	2607 ± 136	2426 ± 94	4887 ± 101	243 ± 14	1003 ± 18	885 ± 97	2346 ± 50
G194R	580G>A	TMD1	765 ± 93	2159 ± 269	2537 ± 190	4477 ± 196	201 ± 7	746 ± 33	832 ± 99	1832 ± 100
G194V	581G>T	TMD1	303 ± 36	1255 ± 286	1233 ± 194	3342 ± 464	89 ± 12	422 ± 54	352 ± 52	1257 ± 36
H199Y	595C>T	TMD1	201 ± 45	454 ± 109	391 ± 47	689 ± 122	70 ± 16	111 ± 12	104 ± 20	188 ± 27
V201M	601G>A	TMD1	496 ± 15	2282 ± 166	1701 ± 262	4523 ± 37	123 ± 11	776 ± 88	468 ± 34	1631 ± 99
P205S	613C>T	TMD1	205 ± 41	478 ± 97	437 ± 22	841 ± 154	71 ± 14	123 ± 15	112 ± 23	245 ± 16
L206W	617T>G	TMD1	203 ± 46	618 ± 81	556 ± 19	1586 ± 203	67 ± 14	151 ± 19	138 ± 17	454 ± 18
L227R	680T>G	TMD1	200 ± 48	476 ± 121	401 ± 72	657 ± 157	70 ± 14	118 ± 11	105 ± 18	197 ± 32
V232D	695T>A	TMD1	202 ± 47	513 ± 113	446 ± 35	1117 ± 209	69 ± 13	120 ± 10	108 ± 21	272 ± 11
A234D	701C>A	TMD1	423 ± 24	1266 ± 281	1549 ± 310	3080 ± 417	124 ± 7	390 ± 21	495 ± 92	1219 ± 31
Q237E	709C>G	TMD1	1299 ± 68	3076 ± 72	3282 ± 109	5328 ± 189	347 ± 17	1129 ± 22	1127 ± 119	2377 ± 47
Q237H	711G>C	TMD1	1339 ± 34	3401 ± 162	3487 ± 166	5954 ± 306	343 ± 19	1229 ± 36	1131 ± 112	2678 ± 90
R258G	772A>G	TMD1	239 ± 56	663 ± 138	749 ± 41	1551 ± 227	77 ± 15	148 ± 22	173 ± 20	440 ± 33
M265R	794T>G	TMD1	223 ± 41	568 ± 185	571 ± 33	1069 ± 146	75 ± 15	130 ± 19	146 ± 17	325 ± 7
F311L	933C>G	TMD1	1199 ± 42	2912 ± 94	3141 ± 26	5260 ± 110	324 ± 12	1094 ± 13	1047 ± 93	2352 ± 21
	933C>A	TMD1	1194 ± 40	2901 ± 89	3169 ± 22	5428 ± 106	354 ± 19	1197 ± 20	1165 ± 140	2637 ± 116
G314E	941G>A	TMD1	894 ± 89	2598 ± 98	2703 ± 150	5091 ± 116	265 ± 10	1041 ± 17	975 ± 115	2489 ± 63
L320V	958T>G	TMD1	1401 ± 21	3491 ± 325	3425 ± 186	5637 ± 494	405 ± 24	1389 ± 26	1251 ± 176	2711 ± 80
R334W	1000C>T	TMD1	1429 ± 50	3421 ± 211	3339 ± 136	5746 ± 483	395 ± 25	1407 ± 28	1214 ± 148	2838 ± 65
R334L	1001G>T	TMD1	219 ± 51	555 ± 111	602 ± 25	1298 ± 236	76 ± 15	143 ± 13	148 ± 13	342 ± 13
R334Q	1001G>A	TMD1	1310 ± 76	2985 ± 91	3277 ± 87	5342 ± 243	363 ± 23	1127 ± 10	1153 ± 144	2454 ± 53
I336K	1007T>A	TMD1	203 ± 44	537 ± 109	469 ± 33	1194 ± 229	73 ± 18	130 ± 17	125 ± 14	351 ± 19
T338I	1013C>T	TMD1	1194 ± 45	3206 ± 193	3098 ± 100	5322 ± 316	327 ± 24	1177 ± 21	1080 ± 116	2466 ± 83
S341P	1021T>C	TMD1	363 ± 18	1354 ± 250	1290 ± 164	3454 ± 370	100 ± 13	402 ± 29	340 ± 29	1167 ± 66
L346P	1037T>C	TMD1	188 ± 52	463 ± 84	387 ± 44	1144 ± 184	67 ± 13	114 ± 11	99 ± 13	321 ± 9
R347H	1040G>A	TMD1	1401 ± 55	3350 ± 219	3697 ± 180	5851 ± 609	368 ± 20	1182 ± 19	1258 ± 138	2658 ± 17
R347P	1040G>C	TMD1	239 ± 39	877 ± 182	1104 ± 141	2784 ± 445	72 ± 15	163 ± 20	228 ± 29	676 ± 34
	1040G>T	TMD1	858 ± 59	2237 ± 140	2925 ± 28	4885 ± 206	193 ± 10	592 ± 63	811 ± 20	1742 ± 89
A349V	1046C>T	TMD1	1036 ± 72	3029 ± 63	2664 ± 100	5321 ± 122	261 ± 10	1082 ± 28	866 ± 60	2274 ± 55
R352W	1054C>T	TMD1	511 ± 23	1636 ± 235	1470 ± 174	3457 ± 385	168 ± 7	639 ± 26	597 ± 80	1653 ± 95
R352Q	1055G>A	TMD1	1424 ± 63	3292 ± 82	3515 ± 134	5674 ± 277	367 ± 16	1132 ± 37	1138 ± 125	2350 ± 15
Q359K/ T360K	1075-1079C>A	TMD1	327 ± 23	1184 ± 267	1583 ± 235	3463 ± 393	98 ± 13	337 ± 25	450 ± 51	1197 ± 44
Q359R	1076A>G	TMD1	1184 ± 66	2943 ± 121	3011 ± 58	5257 ± 169	316 ± 18	1102 ± 39	998 ± 93	2317 ± 40
W361R	1081T>C	TMD1	194 ± 49	435 ± 87	427 ± 64	738 ± 80	69 ± 15	106 ± 16	110 ± 13	203 ± 29
S364P	1090T>C	TMD1	209 ± 43	457 ± 103	423 ± 42	708 ± 113	67 ± 15	108 ± 13	101 ± 15	184 ± 25
G404R	1210G>C		1312 ± 42	3342 ± 232	3212 ± 84	5476 ± 342	372 ± 19	1268 ± 8	1131 ± 134	2576 ± 75
D443Y	1327G>T	NBD1	362 ± 15	1162 ± 276	1071 ± 154	2736 ± 419	121 ± 5	378 ± 14	342 ± 34	1079 ± 40
L453S	1358T>C	NBD1	244 ± 85	527 ± 43	499 ± 182	948 ± 153	66 ± 12	112 ± 12	115 ± 23	255 ± 25
A455E	1364C>A	NBD1	197 ± 50	482 ± 140	400 ± 63	726 ± 95	67 ± 17	101 ± 10	97 ± 15	185 ± 37
V456F	1366G>T	NBD1	203 ± 44	426 ± 95	408 ± 30	777 ± 116	67 ± 15	103 ± 12	101 ± 15	215 ± 24
V456A	1367T>C	NBD1	198 ± 51	460 ± 91	398 ± 46	756 ± 91	71 ± 19	120 ± 12	105 ± 16	210 ± 43
G463D	1388G>T	NBD1	200 ± 33	515 ± 119	731 ± 74	2288 ± 392	69 ± 14	119 ± 18	180 ± 22	705 ± 81
L467P	1400T>C	NBD1	189 ± 48	410 ± 95	367 ± 50	640 ± 87	67 ± 14	104 ± 10	95 ± 16	180 ± 34
M470V	1408A>G	NBD1	1315 ± 63	2987 ± 143	2798 ± 36	4316 ± 210	387 ± 29	1256 ± 35	1119 ± 147	2317 ± 88
E474K	1420G>A	NBD1	196 ± 44	434 ± 92	452 ± 21	1269 ± 283	67 ± 13	105 ± 14	109 ± 14	363 ± 6
G480S	1438G>T	NBD1	206 ± 41	450 ± 101	438 ± 21	1050 ± 168	71 ± 18	113 ± 14	118 ± 18	296 ± 29
S492F	1475C>T	NBD1	195 ± 50	428 ± 91	374 ± 35	734 ± 105	67 ± 16	107 ± 15	100 ± 14	196 ± 19
I502T	1505T>C	NBD1	199 ± 43	426 ± 81	375 ± 57	700 ± 156	68 ± 16	109 ± 15	105 ± 16	208 ± 31
F508C	1523T>G	NBD1	1015 ± 78	2970 ± 108	3056 ± 46	5590 ± 283	263 ± 12	1090 ± 30	964 ± 85	2480 ± 53
D513G	1538A>G	NBD1	199 ± 46	449 ± 101	404 ± 39	736 ± 124	69 ± 15	108 ± 14	103 ± 20	213 ± 30
V520F	1558G>T	NBD1	201 ± 49	445 ± 98	380 ± 48	681 ± 131	67 ± 16	107 ± 13	97 ± 14	192 ± 30
E528E	1584G>A	NBD1	1349 ± 57	3303 ± 171	3281 ± 85	5641 ± 349	345 ± 18	1148 ± 32	1054 ± 106	2414 ± 33
S549N	1646G>A	NBD1	1340 ± 53	3197 ± 138	3227 ± 62	5604 ± 178	379 ± 14	1311 ± 40	1179 ± 134	2792 ± 86
S549R	1645A>C	NBD1	404 ± 21	1097 ± 215	1027 ± 133	2265 ± 376	147 ± 9	458 ± 33	442 ± 65	1110 ± 117
	1647T>A	NBD1	415 ± 9	1108 ± 204	1073 ± 120	2264 ± 339	131 ± 5	393 ± 20	366 ± 42	914 ± 55
	1647T>G	NBD1	385 ± 10	1068 ± 165	1036 ± 80	2251 ± 567	105 ± 15	291 ± 17	256 ± 44	661 ± 88
G551S	1651G>A	NBD1	1483 ± 66	3627 ± 252	3690 ± 250	6283 ± 509	398 ± 12	1391 ± 9	1241 ± 135	2855 ± 34
G551D	1652G>A	NBD1	1429 ± 52	3489 ± 257	3588 ± 129	6172 ± 428	384 ± 16	1344 ± 47	1201 ± 104	2900 ± 48
R553N	1658G>A	NBD1	1334 ± 31	3197 ± 156	3179 ± 148	5442 ± 153	371 ± 22	1251 ± 31	1112 ± 119	2594 ± 72
A554E	(1661C>A)	NBD1	329 ± 37	968 ± 175	918 ± 73	2063 ± 298	115 ± 8	313 ± 26	313 ± 35	792 ± 34
L558S	1673T>C	NBD1	193 ± 47	443 ± 72	365 ± 41	639 ± 114	67 ± 14	103 ± 14	99 ± 16	170 ± 29
A559T	1675G>A	NBD1	199 ± 51	440 ± 82	398 ± 46	659 ± 81	66 ± 17	102 ± 17	95 ± 20	160 ± 21
R560K	1679G>A	NBD1	196 ± 51	425 ± 96	368 ± 39	614 ± 109	66 ± 15	97 ± 13	91 ± 19	170 ± 25
R560T	1679G>C	NBD1	202 ± 49	468 ± 111	396 ± 27	669 ± 91	66 ± 14	104 ± 14	97 ± 18	187 ± 33
R560S	1680A>C	NBD1	192 ± 49	448 ± 119	382 ± 46	666 ± 94	70 ± 17	108 ± 10	103 ± 19	189 ± 32
A561E	1682C>A	NBD1	194 ± 51	410 ± 71	376 ± 45	659 ± 79	69 ± 17	117 ± 17	107 ± 13	193 ± 25
V562I	1684G>A	NBD1	1057 ± 67	2698 ± 128	2646 ± 52	4692 ± 233	286 ± 1	958 ± 48	877 ± 85	2016 ± 35
Y563N	1687T>A	NBD1	193 ± 50	423 ± 85	364 ± 44	656 ± 63	71 ± 23	107 ± 20	98 ± 29	196 ± 44
Y563D	1687T>G	NBD1	193 ± 50	452 ± 127	388 ± 40	654 ± 81	69 ± 13	107 ± 18	103 ± 12	192 ± 31
Y569D	1705T>G	NBD1	206 ± 51	457 ± 90	408 ± 42	682 ± 99	69 ± 17	114 ± 13	103 ± 19	197 ± 40
P574H	1721C>A	NBD1	203 ± 50	475 ± 109	440 ± 45	1047 ± 184	69 ± 17	110 ± 14	118 ± 19	303 ± 12
F575Y	1724T>A	NBD1	227 ± 49	571 ± 130	567 ± 23	1353 ± 213	81 ± 11	161 ± 13	171 ± 17	494 ± 20
G576A	1727G>C	NBD1	1400 ± 58	3318 ± 138	3352 ± 92	5659 ± 291	383 ± 15	1297 ± 55	1152 ± 103	2685 ± 30
D579G	1736A>G	NBD1	398 ± 18	1102 ± 213	1000 ± 98	2227 ± 304	123 ± 9	378 ± 6	351 ± 34	902 ± 84
E588V	1763A>T	NBD1	417 ± 8	1136 ± 253	1009 ± 123	2088 ± 333	124 ± 8	346 ± 39	316 ± 39	713 ± 44
S589T	1766G>C	NBD1	1170 ± 92	2920 ± 37	2832 ± 21	4928 ± 129	312 ± 7	1073 ± 23	963 ± 110	2163 ± 50
I601F	1801A>T	NBD1	236 ± 47	644 ± 156	550 ± 34	1089 ± 165	79 ± 17	142 ± 23	142 ± 16	330 ± 16
H609R	1826A>G	NBD1	201 ± 45	470 ± 93	421 ± 54	768 ± 123	72 ± 19	107 ± 19	100 ± 17	199 ± 24
A613T	1837G>A	NBD1	208 ± 46	476 ± 98	413 ± 43	773 ± 126	69 ± 13	110 ± 20	108 ± 14	209 ± 28
D614G	1841A>G	NBD1	211 ± 55	538 ± 123	448 ± 35	948 ± 139	74 ± 18	127 ± 12	126 ± 16	295 ± 9
I618T	1853T>C	NBD1	209 ± 46	488 ± 110	471 ± 52	994 ± 192	69 ± 14	110 ± 12	115 ± 14	270 ± 11
G622D	1865G>A	NBD1	232 ± 40	723 ± 187	906 ± 75	2722 ± 328	77 ± 15	185 ± 5	263 ± 44	974 ± 81
G628R	1882G>A	NBD1	203 ± 54	489 ± 143	419 ± 44	812 ± 145	69 ± 16	113 ± 13	110 ± 16	234 ± 30
	1882G>C	NBD1	196 ± 50	443 ± 79	398 ± 47	760 ± 138	73 ± 16	119 ± 18	122 ± 21	252 ± 32
R668C	2002C>T	R Domain	1210 ± 61	2968 ± 149	2900 ± 39	5071 ± 152	339 ± 11	1144 ± 10	1051 ± 114	2482 ± 64
S737F	2210C>T	R Domain	1365 ± 46	3295 ± 83	3273 ± 39	5655 ± 202	373 ± 7	1287 ± 33	1141 ± 108	2608 ± 18
P750L	2249C>T	R Domain	363 ± 13	1192 ± 292	1228 ± 219	2757 ± 423	104 ± 11	332 ± 17	341 ± 36	940 ± 19
R751L	2252G>T	R Domain	1199 ± 34	3102 ± 89	3010 ± 57	5095 ± 211	334 ± 21	1147 ± 35	1045 ± 110	2386 ± 59
V754M	2260G>A	R Domain	1316 ± 53	3192 ± 165	3189 ± 147	5394 ± 490	403 ± 30	1421 ± 37	1260 ± 156	2954 ± 114
I807M	2374C>G	R Domain	1329 ± 63	3229 ± 153	3251 ± 150	5529 ± 300	370 ± 21	1249 ± 26	1136 ± 115	2625 ± 55
E822K	2464G>A	R Domain	636 ± 56	1830 ± 354	2184 ± 142	4064 ± 249	179 ± 2	614 ± 34	745 ± 104	1796 ± 79
D836Y	2506G>T		1050 ± 50	2749 ± 112	2715 ± 111	4808 ± 100	295 ± 14	1017 ± 22	915 ± 107	2139 ± 71
S912L	2735C>T	TMD2	939 ± 34	2289 ± 152	2356 ± 168	4212 ± 345	313 ± 13	1060 ± 24	1031 ± 106	2275 ± 54
D924N	2770G>A	TMD2	1312 ± 37	3331 ± 349	3630 ± 357	6192 ± 717	394 ± 8	1428 ± 55	1388 ± 161	3173 ± 109
L927P	2780T>C	TMD2	675 ± 66	1813 ± 277	1760 ± 287	3579 ± 408	218 ± 6	709 ± 19	710 ± 78	1694 ± 44
R933G	2797A>G	TMD2	1617 ± 61	3882 ± 341	3938 ± 269	6709 ± 547	471 ± 14	1636 ± 54	1433 ± 186	3302 ± 87
H939R	2816A>G	TMD2	1285 ± 63	3413 ± 85	3494 ± 135	5857 ± 264	337 ± 18	1145 ± 18	1106 ± 123	2573 ± 39
S945L	2834C>T	TMD2	284 ± 37	997 ± 201	1163 ± 112	2738 ± 306	86 ± 12	253 ± 10	303 ± 29	941 ± 68
M952T	2855T>C	TMD2	1241 ± 51	3020 ± 48	3115 ± 39	5421 ± 252	352 ± 20	1229 ± 10	1126 ± 142	2580 ± 72
M952I	2856G>A	TMD2	916 ± 99	2552 ± 61	2903 ± 68	5042 ± 182	221 ± 6	775 ± 42	849 ± 102	1989 ± 37
L967S	2900T>C	TMD2	728 ± 71	1902 ± 393	1852 ± 255	3415 ± 399	177 ± 3	566 ± 38	534 ± 67	1230 ± 46
G970R	2908G>C	TMD2	1358 ± 51	3228 ± 234	3225 ± 151	5314 ± 278	408 ± 22	1387 ± 25	1221 ± 141	2743 ± 126
G970D	2909G>A	TMD2	1160 ± 74	2821 ± 45	2738 ± 66	4828 ± 147	329 ± 24	1136 ± 16	1000 ± 110	2413 ± 105
S977F	2930C>T	TMD2	1218 ± 96	3010 ± 95	3276 ± 82	5622 ± 261	328 ± 18	1119 ± 47	1128 ± 124	2742 ± 130
I980K	2939T>A	TMD2	224 ± 39	605 ± 135	667 ± 34	1348 ± 216	73 ± 15	134 ± 12	150 ± 15	378 ± 3
L997F	2991G>C	TMD2	1297 ± 64	3275 ± 112	3451 ± 125	5910 ± 374	370 ± 16	1342 ± 28	1270 ± 158	2934 ± 83
Y1014C	3041A>G	TMD2	1139 ± 92	3111 ± 41	3083 ± 19	5309 ± 97	341 ± 22	1198 ± 37	1097 ± 124	2535 ± 93
F1016S	3047T>C	TMD2	361 ± 8	1334 ± 322	1677 ± 295	3682 ± 376	118 ± 9	475 ± 31	569 ± 85	1650 ± 93
I1027T	3080T>C	TMD2	1030 ± 80	2640 ± 108	2540 ± 50	4681 ± 132	270 ± 8	936 ± 51	824 ± 79	1970 ± 12
Y1032C	3095A>G	TMD2	234 ± 51	758 ± 242	1944 ± 177	3971 ± 288	82 ± 15	209 ± 10	712 ± 106	1982 ± 110
T1036N	3107C>A	TMD2	214 ± 66	587 ± 71	1135 ± 98	3228 ± 275	65 ± 15	124 ± 15	231 ± 29	820 ± 36
F1052V	3154T>G	TMD2	1248 ± 48	3204 ± 151	3205 ± 152	5471 ± 335	391 ± 33	1387 ± 51	1282 ± 173	2945 ± 125
T1053I	3158C>T	TMD2	1302 ± 56	3122 ± 105	3074 ± 72	5343 ± 109	333 ± 15	1163 ± 10	999 ± 100	2378 ± 50
H1054D	3160C>G	TMD2	207 ± 52	557 ± 107	1086 ± 139	3412 ± 304	69 ± 16	124 ± 16	293 ± 38	1215 ± 82
K1060T	3179A>C	TMD2	1129 ± 59	2870 ± 115	2783 ± 83	4958 ± 59	323 ± 18	1111 ± 10	992 ± 127	2331 ± 42
G1061R	3181G>C	TMD2	202 ± 42	469 ± 76	546 ± 57	1709 ± 321	69 ± 15	106 ± 16	139 ± 14	511 ± 28
R1066C	3196C>T	TMD2	194 ± 50	426 ± 68	363 ± 66	681 ± 106	67 ± 14	96 ± 12	94 ± 17	169 ± 30
R1066H	3197G>A	TMD2	207 ± 43	508 ± 112	834 ± 88	2822 ± 553	80 ± 18	152 ± 14	276 ± 29	1225 ± 126
A1067T	3199G>A	TMD2	747 ± 45	2361 ± 137	2405 ± 212	4870 ± 92	191 ± 6	820 ± 35	727 ± 75	2007 ± 50
G1069R	3205G>A	TMD2	1330 ± 73	3170 ± 138	3182 ± 19	5586 ± 205	335 ± 18	1135 ± 25	1013 ± 97	2344 ± 14
R1070W	3208C>T	TMD2	431 ± 25	1553 ± 331	1656 ± 253	3800 ± 405	120 ± 11	482 ± 11	427 ± 46	1390 ± 41
R1070Q	3209G>A	TMD2	1402 ± 54	3379 ± 169	3362 ± 133	5549 ± 317	395 ± 20	1344 ± 34	1221 ± 167	2734 ± 85
F1074L	3222T>G	TMD2	371 ± 11	1557 ± 229	1998 ± 205	4373 ± 180	107 ± 8	502 ± 32	618 ± 79	1860 ± 56
L1077P	3230T>C	TMD2	205 ± 46	458 ± 90	557 ± 17	2067 ± 314	68 ± 17	102 ± 16	144 ± 14	662 ± 59
H1085P	3254A>C	TMD2	202 ± 45	449 ± 84	423 ± 17	941 ± 123	69 ± 16	111 ± 18	110 ± 17	252 ± 20
H1085R	3254A>G	TMD2	214 ± 42	557 ± 139	803 ± 66	2258 ± 382	69 ± 17	123 ± 15	190 ± 22	639 ± 10
W1098R	3292T>C	TMD2	210 ± 47	481 ± 102	404 ± 46	676 ± 147	72 ± 17	129 ± 12	111 ± 18	207 ± 41
W1098C	3294G>C	TMD2	209 ± 45	550 ± 125	818 ± 64	2465 ± 422	68 ± 15	122 ± 12	175 ± 29	626 ± 39
	3294G>T	TMD2	221 ± 38	650 ± 204	818 ± 87	2293 ± 377	88 ± 23	189 ± 20	271 ± 34	880 ± 61
F1099L	3297C>A	TMD2	288 ± 31	1067 ± 234	2032 ± 263	4356 ± 177	90 ± 12	318 ± 4	643 ± 99	1771 ± 100
M1101K	3302T>A	TMD2	202 ± 47	463 ± 126	406 ± 45	740 ± 158	69 ± 15	122 ± 9	109 ± 20	211 ± 36
M1101R	3302T>G	TMD2	223 ± 30	509 ± 174	412 ± 51	745 ± 234	80 ± 14	152 ± 7	132 ± 21	271 ± 25
S1118F	3353C>T	TMD2	499 ± 46	1660 ± 291	2015 ± 303	4293 ± 457	133 ± 5	551 ± 34	557 ± 59	1658 ± 112
I1139V	3415A>G	TMD2	1222 ± 60	3124 ± 128	3023 ± 65	5157 ± 227	342 ± 22	1181 ± 39	1052 ± 134	2434 ± 175
D1152H	3454G>C	TMD2	1177 ± 59	3034 ± 205	2861 ± 77	5283 ± 400	293 ± 6	1012 ± 98	893 ± 50	2031 ± 171
V1153E	3458T>A	TMD2	302 ± 34	804 ± 170	980 ± 77	1858 ± 269	93 ± 20	203 ± 32	246 ± 26	566 ± 33
L1156F	3600G>T-3468G>T	TMD2	1248 ± 53	3224 ± 138	3263 ± 95	5550 ± 398	339 ± 16	1203 ± 2	1139 ± 142	2585 ± 71
S1159P	3475T>C	TMD2	1092 ± 39	2850 ± 96	3265 ± 131	5485 ± 328	286 ± 4	1046 ± 42	1076 ± 138	2493 ± 81
S1159F	3476C>T	TMD2	790 ± 71	2275 ± 162	2381 ± 161	15 ± 126	187 ± 3	686 ± 17	667 ± 91	1736 ± 13
R1162L	3485G>T	NBD2	828 ± 88	2243 ± 150	2338 ± 176	4138 ± 273	217 ± 7	754 ± 21	752 ± 82	1772 ± 4
I1234V	3700A>G	NBD2	1331 ± 52	3332 ± 189	3353 ± 128	5680 ± 377	362 ± 19	1303 ± 21	1157 ± 140	2659 ± 26
S1235R	3705T>G	NBD2	1345 ± 59	3405 ± 192	3378 ± 119	5751 ± 320	361 ± 14	1246 ± 33	1106 ± 108	2593 ± 91
V1240G	3719T>G	NBD2	671 ± 157	1840 ± 350	1793 ± 387	3072 ± 524	164 ± 14	644 ± 59	583 ± 95	1356 ± 49
G1244E	3731G>A	NBD2	1352 ± 23	3364 ± 206	3353 ± 184	5631 ± 384	375 ± 21	1290 ± 11	1176 ± 130	2727 ± 97
T1246I	3737C>T	NBD2	1293 ± 59	3253 ± 144	3286 ± 87	5633 ± 307	335 ± 11	1133 ± 45	1044 ± 109	2439 ± 72
G1249R	3745G>A	NBD2	1220 ± 51	3155 ± 176	3087 ± 75	5352 ± 348	357 ± 20	1248 ± 38	1153 ± 154	2727 ± 141
S1251N	3752G>A	NBD2	1353 ± 41	3290 ± 176	3313 ± 165	5769 ± 330	371 ± 17	1276 ± 8	1146 ± 129	2654 ± 26
S1255P	3763T>C	NBD2	1258 ± 54	3153 ± 173	3161 ± 89	5435 ± 299	318 ± 15	1136 ± 36	1025 ± 121	2374 ± 16
I1269N	3806T>A	NBD2	554 ± 106	1420 ± 324	1419 ± 344	2391 ± 432	149 ± 4	547 ± 16	492 ± 47	1169 ± 7
D1270N	3808G>A	NBD2	1242 ± 88	3122 ± 51	3151 ± 42	5479 ± 180	342 ± 12	1199 ± 29	1093 ± 122	2573 ± 44
W1282R	3844T>C	NBD2	363 ± 35	925 ± 264	949 ± 230	1551 ± 393	110 ± 16	326 ± 32	302 ± 43	720 ± 22
R1283M	3848G>T	NBD2	422 ± 59	1132 ± 308	1151 ± 270	1855 ± 418	122 ± 16	398 ± 38	375 ± 42	843 ± 15
R1283S	3849G>C	NBD2	465 ± 82	1252 ± 336	1220 ± 290	2064 ± 431	130 ± 15	430 ± 15	414 ± 52	982 ± 43
Q1291R	3872A>G	NBD2	1389 ± 70	3474 ± 173	3453 ± 110	5869 ± 326	361 ± 16	1275 ± 15	1120 ± 131	2516 ± 78
Q1291H	3873G>C	NBD2	1280 ± 62	3203 ± 104	3235 ± 86	5568 ± 203	327 ± 14	1083 ± 25	1018 ± 111	2285 ± 55
V1293G	3878T>G	NBD2	1331 ± 61	3329 ± 164	3314 ± 47	5581 ± 117	363 ± 14	1250 ± 23	1119 ± 128	2487 ± 47
N1303K	3909C>G	NBD2	262 ± 34	630 ± 154	609 ± 58	1034 ± 219	88 ± 15	226 ± 6	206 ± 30	432 ± 5
L1324P	3971T>C	NBD2	249 ± 44	579 ± 124	548 ± 31	975 ± 211	91 ± 14	223 ± 7	210 ± 16	441 ± 18
L1335P	4004T>C	NBD2	243 ± 30	623 ± 151	564 ± 57	967 ± 168	97 ± 15	224 ± 25	224 ± 13	458 ± 5
G1349D	4046G>A	NBD2	1225 ± 38	3029 ± 77	3062 ± 59	5304 ± 214	338 ± 20	1152 ± 46	1060 ± 115	2437 ± 57
I1366N	4097T>A	NBD2	408 ± 59	1050 ± 265	1048 ± 239	1685 ± 374	148 ± 11	558 ± 22	510 ± 79	1163 ± 50
H1375P	4124A>C		1253 ± 69	3167 ± 42	3171 ± 66	5497 ± 218	353 ± 31	1287 ± 10	1171 ± 126	2767 ± 134
L1480P	4439T>C		1080 ± 93	2698 ± 85	2658 ± 60	4535 ± 131	295 ± 12	1098 ± 38	941 ± 123	2181 ± 84
L138ins	413_415dupTAC	TMD1	201 ± 49	572 ± 115	486 ± 40	2039 ± 293	75 ± 14	171 ± 20	142 ± 18	579 ± 25
F312DEL	935_937del	NBD1	647 ± 77	2008 ± 224	2329 ± 124	4508 ± 98	164 ± 2	683 ± 24	762 ± 87	1940 ± 156
I507del	1519_1521delATC	NBD1	199 ± 51	425 ± 87	365 ± 50	626 ± 89	75 ± 18	123 ± 14	112 ± 21	211 ± 29
F508del	1521_1523delCTT	NBD1	195 ± 47	453 ± 108	410 ± 47	891 ± 150	68 ± 15	110 ± 12	110 ± 16	256 ± 26
T854T	2562T>A		1294 ± 51	3240 ± 145	3213 ± 88	5519 ± 358	357 ± 10	1216 ± 17	1072 ± 125	2486 ± 54
	2562T>C		1329 ± 72	3214 ± 194	3270 ± 21	5657 ± 238	350 ± 18	1193 ± 54	1063 ± 117	2478 ± 68
	2562T>G		1287 ± 53	3169 ± 189	3164 ± 147	5401 ± 312	364 ± 14	1251 ± 44	1134 ± 116	2588 ± 72
Q966=	2988G>A	TMD2	1324 ± 43	3171 ± 147	3196 ± 88	5527 ± 156	332 ± 19	1132 ± 59	1000 ± 95	2308 ± 68
L1156=	3598T>C-3466T>C	TMD2	1299 ± 58	3298 ± 269	3167 ± 139	5429 ± 258	373 ± 24	1255 ± 5	1117 ± 96	2651 ± 138
	3600G>A-3468G>A	TMD2	1308 ± 55	3307 ± 201	3213 ± 160	5414 ± 261	373 ± 25	1299 ± 31	1151 ± 136	2695 ± 105
	3468G>A	TMD2	1312 ± 46	3232 ± 178	3186 ± 149	5514 ± 255	346 ± 16	1162 ± 21	1037 ± 77	2386 ± 60
E60X	178G>T	Lasso	207 ± 46	478 ± 136	393 ± 33	675 ± 93	79 ± 14	148 ± 29	130 ± 23	272 ± 48
Q493X	1477C>T	NBD1	198 ± 43	412 ± 73	384 ± 56	647 ± 97	69 ± 16	113 ± 17	107 ± 20	196 ± 34
G542X	1624G>T	NBD1	205 ± 40	459 ± 104	403 ± 43	652 ± 76	73 ± 19	117 ± 19	109 ± 15	205 ± 46
R553X	1657C>T	NBD1	203 ± 38	442 ± 77	402 ± 17	647 ± 80	69 ± 14	116 ± 21	106 ± 18	199 ± 33
S912X	2735C>A	TMD2	202 ± 49	428 ± 82	387 ± 35	664 ± 128	74 ± 16	125 ± 17	115 ± 21	225 ± 43
W1089X	3266G>A	TMD2	206 ± 46	448 ± 105	396 ± 51	690 ± 96	71 ± 16	124 ± 13	110 ± 14	198 ± 34
Y1092X	3276C>A	TMD2	210 ± 39	457 ± 112	402 ± 44	663 ± 67	70 ± 14	134 ± 14	118 ± 21	227 ± 22
	3276C>G	TMD2	210 ± 49	490 ± 132	418 ± 43	689 ± 124	74 ± 14	129 ± 21	124 ± 25	237 ± 37
E1104X	3310G>T	TMD2	195 ± 49	453 ± 159	390 ± 50	675 ± 118	68 ± 15	114 ± 12	104 ± 19	192 ± 31
R1158X	3472C>T	TMD2	220 ± 56	523 ± 135	447 ± 81	740 ± 110	86 ± 16	189 ± 11	152 ± 13	351 ± 26
R1162X	3484C>T	TMD2	206 ± 39	463 ± 108	402 ± 39	696 ± 90	73 ± 15	130 ± 15	129 ± 29	256 ± 10
S1196X	3587C>G	TMD2	962 ± 166	2220 ± 202	2055 ± 254	3143 ± 290	245 ± 8	856 ± 26	701 ± 95	1381 ± 57
W1204X	3611G>A	NBD2	971 ± 147	2170 ± 251	1897 ± 278	2866 ± 417	234 ± 5	806 ± 54	622 ± 75	1265 ± 32
	3612G>A	NBD2	916 ± 167	2002 ± 339	1736 ± 319	2472 ± 407	214 ± 9	690 ± 80	543 ± 75	1045 ± 33
W1282X	3846G>A	NBD2	353 ± 29	908 ± 247	900 ± 149	1533 ± 295	108 ± 8	365 ± 3	332 ± 64	825 ± 146
Q1313X	3937C>T	NBD2	202 ± 52	461 ± 126	404 ± 50	668 ± 108	68 ± 16	113 ± 21	106 ± 22	187 ± 32
