# Supplementary material for: General trends in the calnexin-dependent expression and pharmacological rescue of clinical CFTR variants
Source: eLife. 2025 Dec 11;14:RP107180. doi: 10.7554/eLife.107180 (PMC12698086; doi:10.7554/eLife.107180)
Supplement: Supplementary file 3. [file elife-107180-supp3.xlsx]

## Sheet: Primer Design to Order
Mutagenic Oligonucleotides
Protein Substitution	Gentic Mutation	Reverse Oligo Sequence	Forward Oligo Sequence
R3W	7A>T	5'-TTTTCCAGAGGCGACCACTGCATGGTCTC-3'	5'-GAGACCATGCAGTGGTCGCCTCTGGAAAA-3'
S13F	38C>T	5'-ccagctgaaaaaaagtttgaagacaacgctggccttttc-3'	5'-gaaaaggccagcgttgtcttcaaactttttttcagctgg-3'
L15P	44T>C	5'-tggtccagctgaaaaaaggtttggagacaacgctg-3'	5'-cagcgttgtctccaaaccttttttcagctggacca-3'
G27R	79G>A	5'-caggcgctgtctgtatcttttcctcaaaattggtctg-3'	5'-cagaccaattttgaggaaaagatacagacagcgcctg-3'
R31L	92G>T	5'-tgtctgacaattccaggagctgtctgtatcctttc-3'	5'-gaaaggatacagacagctcctggaattgtcagaca-3'
A46D	137C>A	5'-ccaatttttcagatagattgtcatcagaatcaacagaagggatttgg-3'	5'-ccaaatcccttctgttgattctgatgacaatctatctgaaaaattgg-3'
E56K	166G>A	5'-aagccagctctctatcccattttctttccaatttttcagatag-3'	5'-ctatctgaaaaattggaaagaaaatgggatagagagctggctt-3'
E60K	178G>A	5'-ctttgaagccagctttctatcccattctctttccaatttttc-3'	5'-gaaaaattggaaagagaatgggatagaaagctggcttcaaag-3'
R74Q	221G>A	5'-aatctccagaaaaaacatcgctgaagggcattaatgagtttag-3'	5'-ctaaactcattaatgcccttcagcgatgttttttctggagatt-3'
G91R	271G>A	5'-tgctttggtgacttcccttaaatataaaaagattccatagaacataaatct-3'	5'-agatttatgttctatggaatctttttatatttaagggaagtcaccaaagca-3'
P99L	296C>T	5'-ttcttcccagtaagagaagctgtactgctttggtg-3'	5'-caccaaagcagtacagcttctcttactgggaagaa-3'
L102R	305T>G	5'-gaagctatgattcttccccgtaagagaggctgtactg-3'	5'-cagtacagcctctcttacggggaagaatcatagcttc-3'
Y109N	325T>A	5'-ccttgttatccgggtcattggaagctatgattcttcc-3'	5'-ggaagaatcatagcttccaatgacccggataacaagg-3'
E116K	346G>A	5'-atcgcgatagagcgtttctccttgttatccggg-3'	5'-cccggataacaaggagaaacgctctatcgcgat-3'
R117G	349C>G	5'-taaatcgcgatagagctttcctccttgttatccgg-3'	5'-ccggataacaaggaggaaagctctatcgcgattta-3'
R117P	350G>C	5'-gataaatcgcgatagagggttcctccttgttatcc-3'	5'-ggataacaaggaggaaccctctatcgcgatttatc-3'
R117L	350G>T	5'-agataaatcgcgatagagagttcctccttgttatccg-3'	5'-cggataacaaggaggaactctctatcgcgatttatct-3'
A120T	358G>A	5'-atgcctagataaatcgtgatagagcgttcctccttg-3'	5'-caaggaggaacgctctatcacgatttatctaggcat-3'
H139R	416A>G	5'-ccaaaaatggctgggcgtaggagcagtgtcc-3'	5'-ggacactgctcctacgcccagccatttttgg-3'
Y161D	481T>G	5'-cttgacagctttaaagtcttcttatcaatcaaactaaacatagctattctc-3'	5'-gagaatagctatgtttagtttgattgataagaagactttaaagctgtcaag-3'
Y161S	482A>C	5'-gcttgacagctttaaagtcttcttagaaatcaaactaaacatagctattctc-3'	5'-gagaatagctatgtttagtttgatttctaagaagactttaaagctgtcaagc-3'
R170H	509G>A	5'-ccaatacttattttatctagaacatggcttgacagctttaaagtcttc-3'	5'-gaagactttaaagctgtcaagccatgttctagataaaataagtattgg-3'
I175V	514C>A	5'-ttgtccaatacttattttatctataacacggcttgacagctttaaag-3'	5'-ctttaaagctgtcaagccgtgttatagataaaataagtattggacaa-3'
G178E	533G>A	5'-gaaaggagactaacaagttgttcaatacttattttatctagaacacg-3'	5'-cgtgttctagataaaataagtattgaacaacttgttagtctcctttc-3'
F191V	571T>G	5'-caatgcaagtccttcatcaactttgttcaggttgttggaaag-3'	5'-ctttccaacaacctgaacaaagttgatgaaggacttgcattg-3'
D192G	575A>G	5'-ccaatgcaagtccttcaccaaatttgttcaggttgttggaaa-3'	5'-tttccaacaacctgaacaaatttggtgaaggacttgcattgg-3'
E193K	577G>A	5'-ccaatgcaagtcctttatcaaatttgttcaggttgttggaaagg-3'	5'-cctttccaacaacctgaacaaatttgataaaggacttgcattgg-3'
G194R	580G>A	5'-tgccaatgcaagtctttcatcaaatttgttcaggttgttgg-3'	5'-ccaacaacctgaacaaatttgatgaaagacttgcattggca-3'
G194V	581G>T	5'-cgaaatgtgccaatgcaagtacttcatcaaatttgttcagg-3'	5'-cctgaacaaatttgatgaagtacttgcattggcacatttcg-3'
H199Y	595C>T	5'-agcgatccacacgaaatatgccaatgcaagtcctt-3'	5'-aaggacttgcattggcatatttcgtgtggatcgct-3'
A234D	701C>A	5'-gcccagcctgaaaaaggtcaaggactatcaggaaa-3'	5'-tttcctgatagtccttgacctttttcaggctgggc-3'
Q237E	709C>G	5'-tagcccagcctcaaaaagggcaaggactatcag-3'	5'-ctgatagtccttgccctttttgaggctgggcta-3'
Q237H	711G>C	5'-cctagcccagcgtgaaaaagggcaaggactatc-3'	5'-gatagtccttgccctttttcacgctgggctagg-3'
R258G	772A>G	5'-gtaatcacaagtccttcactgatcttcccagctctct-3'	5'-agagagctgggaagatcagtgaaggacttgtgattac-3'
M265R	794T>G	5'-ggatgttctcgatcctttctgaggtaatcacaagtctttc-3'	5'-gaaagacttgtgattacctcagaaaggatcgagaacatcc-3'
F311L	933C>A	5'-caaagaaccctgagaataagaaggctgagctattgaagt-3'	5'-acttcaatagctcagccttcttattctcagggttctttg-3'
F312del	935_937del	5'-tagctcagccttcttctcagggttctttgtggtg-3'	5'-caccacaaagaaccctgagaagaaggctgagcta-3'
G314E	941G>A	5'-ataaaaacaccacaaagaactctgagaagaagaaggctgag-3'	5'-ctcagccttcttcttctcagagttctttgtggtgtttttat-3'
L320V	958T>G	5'-gggaagcacagatacaaacaccacaaagaaccctg-3'	5'-cagggttctttgtggtgtttgtatctgtgcttccc-3'
R334Q	1001G>A	5'-gagatggtggtgaatattttctggaggatgattcctttgatta-3'	5'-taatcaaaggaatcatcctccagaaaatattcaccaccatctc-3'
L346P	1037T>C	5'-gaccgccatgcgcggaacaatgcagaatgaga-3'	5'-tctcattctgcattgttccgcgcatggcggtc-3'
R347L	1040G>T	5'-cgagtgaccgccatgagcagaacaatgcaga-3'	5'-tctgcattgttctgctcatggcggtcactcg-3'
R352W	1054C>T	5'-gggaaattgccaagtgaccgccatgcgcag-3'	5'-ctgcgcatggcggtcacttggcaatttccc-3'
Q359R	1076A>G	5'-gagagtcataccatgttcgtacagcccagggaaat-3'	5'-atttccctgggctgtacgaacatggtatgactctc-3'
W361R	1081T>C	5'-aagagagtcataccgtgtttgtacagcccagggaa-3'	5'-ttccctgggctgtacaaacacggtatgactctctt-3'
S364P	1090T>C	5'-ttttgtttattgctccaagagggtcataccatgtttgtacagc-3'	5'-gctgtacaaacatggtatgaccctcttggagcaataaacaaaa-3'
E403D	1210G>C	5'-aaataattccccaaatcgctcctcccagaaggctg-3'	5'-cagccttctgggaggagcgatttggggaattattt-3'
D443Y	1327G>T	5'-ctctttctatcttgaaattaatatatttcaggacaggagtaccaagaa-3'	5'-ttcttggtactcctgtcctgaaatatattaatttcaagatagaaagag-3'
L453S	1358T>C	5'-atccagcaaccgccaaccactgtcctctttctatc-3'	5'-gatagaaagaggacagtggttggcggttgctggat-3'
V456F	1366G>T	5'-cagtggatccagcaaacgccaacaactgtcc-3'	5'-ggacagttgttggcgtttgctggatccactg-3'
G463V	1388G>T	5'-ttagaagtgaagtcttgactgctccagtggatcc-3'	5'-ggatccactggagcagtcaagacttcacttctaa-3'
E474K	1420G>A	5'-cctctgaaggctccagttttcccataatcatcattag-3'	5'-ctaatgatgattatgggaaaactggagccttcagagg-3'
G480C	1438G>T	5'-cactgtgcttaattttacactctgaaggctccagttc-3'	5'-gaactggagccttcagagtgtaaaattaagcacagtg-3'
F508C	1523T>G	5'-tcataggaaacaccacagatgatattttctttaatggtgccaggc-3'	5'-gcctggcaccattaaagaaaatatcatctgtggtgtttcctatga-3'
D513G	1538A>G	5'-acgcttctgtatctatattcaccataggaaacaccaaagatgatat-3'	5'-atatcatctttggtgtttcctatggtgaatatagatacagaagcgt-3'
E528E	1584G>A	5'-gcaaacttggagatgtcttcttctagttggcatgc-3'	5'-gcatgccaactagaagaagacatctccaagtttgc-3'
R553Q	1658G>A	5'-gctaaagaaattcttgcttgttgacctccactcagtg-3'	5'-cactgagtggaggtcaacaagcaagaatttctttagc-3'
A554E	(1661C>A)	5'-ctcttgctaaagaaattctttctcgttgacctccactcag-3'	5'-ctgagtggaggtcaacgagaaagaatttctttagcaagag-3'
R560S	1680A>C	5'-aatcagcatctttgtatactgcgcttgctaaagaaattcttgctc-3'	5'-gagcaagaatttctttagcaagcgcagtatacaaagatgctgatt-3'
Y563D	1687T>G	5'-aaatacaaatcagcatctttgtctactgctcttgctaaagaaattcttg-3'	5'-caagaatttctttagcaagagcagtagacaaagatgctgatttgtattt-3'
F575Y	1724T>A	5'-taaaacatctaggtatccataaggagagtctaataaatacaaatcagc-3'	5'-gctgatttgtatttattagactctccttatggatacctagatgtttta-3'
E588V	1763A>T	5'-catcagtttacagacacagcttacaaatatttctttttctgttaaaacatctag-3'	5'-ctagatgttttaacagaaaaagaaatatttgtaagctgtgtctgtaaactgatg-3'
S589N	1766G>C	5'-ccatcagtttacagacacaggtttcaaatatttctttttctgttaaaac-3'	5'-gttttaacagaaaaagaaatatttgaaacctgtgtctgtaaactgatgg-3'
I601F	1801A>T	5'-ccattttagaagtgaccaaaaacctagttttgttagccatcag-3'	5'-ctgatggctaacaaaactaggtttttggtcacttctaaaatgg-3'
A613T	1837G>A	5'-catgcaaaattaatattttgtcagttttctttaaatgttccattttagaagtgaccaa-3'	5'-ttggtcacttctaaaatggaacatttaaagaaaactgacaaaatattaattttgcatg-3'
I618T	1853T>C	5'-ctgctaccttcatgcaaagttaatattttgtcagctttctttaaatgttcc-3'	5'-ggaacatttaaagaaagctgacaaaatattaactttgcatgaaggtagcag-3'
G622D	1865G>A	5'-gaaaatgtcccataaaaatagctgctatcttcatgcaaaattaatattttgtcag-3'	5'-ctgacaaaatattaattttgcatgaagatagcagctatttttatgggacattttc-3'
G628R	1882G>C	5'-gagttctgaaaatgtccgataaaaatagctgctaccttcatgc-3'	5'-gcatgaaggtagcagctatttttatcggacattttcagaactc-3'
S737F	2210C>T	5'-ctcagaatctggtactaagaacagccttctctctaaagg-3'	5'-cctttagagagaaggctgttcttagtaccagattctgag-3'
R751L	2252G>T	5'-ctgatcacgctgatgagaggcagtatcgcct-3'	5'-aggcgatactgcctctcatcagcgtgatcag-3'
R792G	2374C>G	5'-gccagtgacacttttcctgtggatgctgttgtc-3'	5'-gacaacagcatccacaggaaaagtgtcactggc-3'
I807M	2421A>G	5'-cttgagataaccttcttgaatacatatccagttcagtcaagtttgc-3'	5'-gcaaacttgactgaactggatatgtattcaagaaggttatctcaag-3'
E822K	2464G>A	5'-taagtcttcttcgttaatttctttacttatttccaagccagtttcttg-3'	5'-caagaaactggcttggaaataagtaaagaaattaacgaagaagactta-3'
D836Y	2506G>T	5'-ctggtatgctctccatataatcaaaaaagcactcctttaagtctt-3'	5'-aagacttaaaggagtgcttttttgattatatggagagcataccag-3'
S912L	2735C>T	5'-cgtaaatgtaaaacacataatacaaactggtgctggtgataatcac-3'	5'-gtgattatcaccagcaccagtttgtattatgtgttttacatttacg-3'
D924N	2770G>A	5'-catagcaagcaaagtgttggctactcccacgtaaa-3'	5'-tttacgtgggagtagccaacactttgcttgctatg-3'
R933G	2797A>G	5'-caccagtggtagacctccgaagaatcccatagcaa-3'	5'-ttgctatgggattcttcggaggtctaccactggtg-3'
H939R	2816A>G	5'-acactgtgattagagtacgcaccagtggtagacct-3'	5'-aggtctaccactggtgcgtactctaatcacagtgt-3'
M952T	2855T>C	5'-cttgaagaacagaatgtaacgttttgtggtgtaaaattttcgacact-3'	5'-agtgtcgaaaattttacaccacaaaacgttacattctgttcttcaag-3'
M952I	2856G>A	5'-gcttgaagaacagaatgtaatattttgtggtgtaaaattttcgacact-3'	5'-agtgtcgaaaattttacaccacaaaatattacattctgttcttcaagc-3'
D979V	2936A>T	5'-gaaggtcatccaaaattgctataactttggagaatctattaagaatc-3'	5'-gattcttaatagattctccaaagttatagcaattttggatgaccttc-3'
I980K	2939T>A	5'-ggtcatccaaaattgctttatctttggagaatctattaagaatccc-3'	5'-gggattcttaatagattctccaaagataaagcaattttggatgacc-3'
A1006E	3017C>A	5'-ggttgtaaaactgcgacaacttctatagctccaatcacaatta-3'	5'-taattgtgattggagctatagaagttgtcgcagttttacaacc-3'
Y1014C	3041A>G	5'-cactgttgcaacaaagatgcagggttgtaaaactgcgac-3'	5'-gtcgcagttttacaaccctgcatctttgttgcaacagtg-3'
F1016S	3047T>C	5'-cactgttgcaacagagatgtagggttgtaaaactgcga-3'	5'-tcgcagttttacaaccctacatctctgttgcaacagtg-3'
T1053I	3158C>T	5'-cttgtaacaagatgaatgaaaattggactcctgccttcag-3'	5'-ctgaaggcaggagtccaattttcattcatcttgttacaag-3'
K1060T	3179A>C	5'-aagtgtccatagtcctgttaagcttgtaacaagatgagtgaaaattgg-3'	5'-ccaattttcactcatcttgttacaagcttaacaggactatggacactt-3'
A1067T	3199G>A	5'-ccgtccgaaggtacgaagtgtccatagtcctt-3'	5'-aaggactatggacacttcgtaccttcggacgg-3'
H1085P	3254A>C	5'-caagaaccagttggcagtaggtaaattcagagctttgtgg-3'	5'-ccacaaagctctgaatttacctactgccaactggttcttg-3'
H1085R	3254A>G	5'-caagaaccagttggcagtacgtaaattcagagctttgtgg-3'	5'-ccacaaagctctgaatttacgtactgccaactggttcttg-3'
W1098C	3294G>C	5'-ttctattctcatttggaagcagcgcagtgttgacag-3'	5'-ctgtcaacactgcgctgcttccaaatgagaatagaa-3'
W1098C	3294G>T	5'-tttctattctcatttggaaacagcgcagtgttgacagg-3'	5'-cctgtcaacactgcgctgtttccaaatgagaatagaaa-3'
F1099L	3297C>A	5'-atcatttctattctcatttgtaaccagcgcagtgttgacag-3'	5'-ctgtcaacactgcgctggttacaaatgagaatagaaatgat-3'
M1101R	3302T>G	5'-gacaaaaatcatttctattctcctttggaaccagcgcagtgttg-3'	5'-caacactgcgctggttccaaaggagaatagaaatgatttttgtc-3'
S1118F	3353C>T	5'-ctccttctcctgttgttaaaatgaaaatgaaggtaacagcaatgaag-3'	5'-cttcattgctgttaccttcattttcattttaacaacaggagaaggag-3'
I1139V	3415A>G	5'-gcaatgtactcatgacattcatggctaaagtcaggataatacca-3'	5'-tggtattatcctgactttagccatgaatgtcatgagtacattgc-3'
V1153E	3458T>A	5'-gatcgcatcaagctatcctcatctatgctggagttta-3'	5'-taaactccagcatagatgaggatagcttgatgcgatc-3'
S1159P	3475T>C	5'-aagactcggctcacaggtcgcatcaagctatcc-3'	5'-ggatagcttgatgcgacctgtgagccgagtctt-3'
V1240G	3719T>G	5'-cccaagaggccccccctctggccag-3'	5'-ctggccagagggggggcctcttggg-3'
G1249R	3745G>A	5'-aagtactcttccttgatccagttcttcccaagagg-3'	5'-cctcttgggaagaactggatcaaggaagagtactt-3'
W1282R	3844T>C	5'-ctccaaaggctttcctccgctgttgcaaagttattga-3'	5'-tcaataactttgcaacagcggaggaaagcctttggag-3'
R1283S	3849G>C	5'-atcactccaaaggctttgctccactgttgcaaagt-3'	5'-actttgcaacagtggagcaaagcctttggagtgat-3'
R1283M	3848G>T	5'-gtatcactccaaaggctttcatccactgttgcaaagttatt-3'	5'-aataactttgcaacagtggatgaaagcctttggagtgatac-3'
Q1291R	3872A>G	5'-ttccagaaaaaataaatactttccgtggtatcactccaaaggcttt-3'	5'-aaagcctttggagtgataccacggaaagtatttattttttctggaa-3'
V1293G	(3878T>G)	5'-ctaaatgttccagaaaaaataaatcctttctgtggtatcactccaaag-3'	5'-ctttggagtgataccacagaaaggatttattttttctggaacatttag-3'
L1324P	3971T>C	5'-gttctatcacagatctgggcccaacctcatctgca-3'	5'-tgcagatgaggttgggcccagatctgtgatagaac-3'
I1366N	4097T>A	5'-gttcatcaagcagcaagttcttcgccttactgaga-3'	5'-tctcagtaaggcgaagaacttgctgcttgatgaac-3'
H1375P	4124A>C	5'-gtatgttactggatccaaaggagcactgggttcatcaag-3'	5'-cttgatgaacccagtgctcctttggatccagtaacatac-3'
L1480P	4439T>C	5'CATTTATGCTGCTCTCTAAGGCCTTGTATCTTGCACC-3'	5'GGTGCAAGATACAAGGCCTTAGAGAGCAGCATAAATG-3'
NGS Library Preparation
Primer Description	Oligo Sequence
First Round Nested PCR FWD	AGTTTCTAAGCCTTACGACAGACCTATTGCATGAAGAATCTGCTTAGGGT
First Round Nested PCR REV	GCGGGTTTCTTGGATCTATATGTGGTC
Second Round Nested PCR FWD 1	AATGATACGGCGACCACCGAGATCTACACagcgctagACACTCTTTCCCTACACGACGCTCTTCCGATCTNNNNAGTTTCTAAGCCTTACGACAGACC*T
Second Round Nested PCR FWD 2	AATGATACGGCGACCACCGAGATCTACACgatatcgaACACTCTTTCCCTACACGACGCTCTTCCGATCTNNNNAGTTTCTAAGCCTTACGACAGACC*T
Second Round Nested PCR FWD 3	AATGATACGGCGACCACCGAGATCTACACcgcagacgACACTCTTTCCCTACACGACGCTCTTCCGATCTNNNNAGTTTCTAAGCCTTACGACAGACC*T
Second Round Nested PCR REV 1	C*AAGCAGAAGACGGCATACGAGATaagtatgtGTGACTGGAGTTCAGACGTGTGCTCTTCCGATCTGAACGCGTATATCTGGCCCGTAC
Second Round Nested PCR REV 2	C*AAGCAGAAGACGGCATACGAGATttggcgcaGTGACTGGAGTTCAGACGTGTGCTCTTCCGATCTGAACGCGTATATCTGGCCCGTAC
Second Round Nested PCR REV 3	C*AAGCAGAAGACGGCATACGAGATgcgagtgtGTGACTGGAGTTCAGACGTGTGCTCTTCCGATCTGAACGCGTATATCTGGCCCGTAC
Second Round Nested PCR REV 4	C*AAGCAGAAGACGGCATACGAGATggagagctGTGACTGGAGTTCAGACGTGTGCTCTTCCGATCTGAACGCGTATATCTGGCCCGTAC
Second Round Nested PCR REV 5	C*AAGCAGAAGACGGCATACGAGATaggcgctcGTGACTGGAGTTCAGACGTGTGCTCTTCCGATCTGAACGCGTATATCTGGCCCGTAC
Second Round Nested PCR REV 6	C*AAGCAGAAGACGGCATACGAGATccattagaGTGACTGGAGTTCAGACGTGTGCTCTTCCGATCTGAACGCGTATATCTGGCCCGTAC
Second Round Nested PCR REV 7	C*AAGCAGAAGACGGCATACGAGATacgcgagtGTGACTGGAGTTCAGACGTGTGCTCTTCCGATCTGAACGCGTATATCTGGCCCGTAC
Second Round Nested PCR REV 8	C*AAGCAGAAGACGGCATACGAGATacaatgtgGTGACTGGAGTTCAGACGTGTGCTCTTCCGATCTGAACGCGTATATCTGGCCCGTAC
Second Round Nested PCR REV 9	C*AAGCAGAAGACGGCATACGAGATccagaggtGTGACTGGAGTTCAGACGTGTGCTCTTCCGATCTGAACGCGTATATCTGGCCCGTAC
Second Round Nested PCR REV 10	C*AAGCAGAAGACGGCATACGAGATttctccagGTGACTGGAGTTCAGACGTGTGCTCTTCCGATCTGAACGCGTATATCTGGCCCGTAC
Second Round Nested PCR REV 11	C*AAGCAGAAGACGGCATACGAGATcgaatgttGTGACTGGAGTTCAGACGTGTGCTCTTCCGATCTGAACGCGTATATCTGGCCCGTAC
Second Round Nested PCR REV 12	C*AAGCAGAAGACGGCATACGAGATgcctaatcGTGACTGGAGTTCAGACGTGTGCTCTTCCGATCTGAACGCGTATATCTGGCCCGTAC
Second Round Nested PCR REV 13	C*AAGCAGAAGACGGCATACGAGATcgatatggGTGACTGGAGTTCAGACGTGTGCTCTTCCGATCTGAACGCGTATATCTGGCCCGTAC
Second Round Nested PCR REV 14	C*AAGCAGAAGACGGCATACGAGATacactagtGTGACTGGAGTTCAGACGTGTGCTCTTCCGATCTGAACGCGTATATCTGGCCCGTAC
Second Round Nested PCR REV 15	C*AAGCAGAAGACGGCATACGAGATcccatataGTGACTGGAGTTCAGACGTGTGCTCTTCCGATCTGAACGCGTATATCTGGCCCGTAC
Second Round Nested PCR REV 16	C*AAGCAGAAGACGGCATACGAGATgagacgagGTGACTGGAGTTCAGACGTGTGCTCTTCCGATCTGAACGCGTATATCTGGCCCGTAC
Amplicon Amplification FWD	AATGATACGGCGACCACCGAGATC
Amplicon Amplification REV	CAAGCAGAAGACGGCATACGAG
* Phosphorothioate linkage
