# Supplementary figures and images for: General trends in the calnexin-dependent expression and pharmacological rescue of clinical CFTR variants
Source: eLife journal article supplement (doi:10.7554/elife.107180), 2025-07-31

**CANX KO  
HEK293T**

95-

55-

26-

17-

**CANX**

## Cyclophillin B

# B

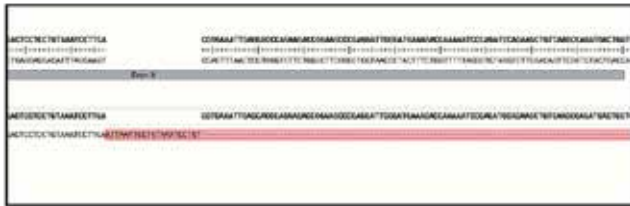

Supplement: fig1-data1 [file Figure 1 Supplement 2 Source Data 1.pdf › Figure 1 Supplement 2 Source Data 1/Figure 1 Supplement 2 Source Data 1.pdf]
